# Supplementary material for: Porous ceramic hollow fiber-supported Pebax/PEGDME composite membrane for CO2 separation from biohythane
Source: Royal Society of Chemistry journal article supplement (doi:10.1039/c5ra10619b), 2015-01-01
Supplement: c5ra10619b1.pdf [file c5ra10619b1.pdf]

## Supplementary File

### Experimental:

A Nicolet 5700 Fourier transform infrared spectrometer with a scan range of 4000  $\text{cm}^{-1}$  to 400  $\text{cm}^{-1}$  and a resolution of 0.09  $\text{cm}^{-1}$  was used to obtain the Fourier transform infrared (FT-IR) spectra of the Pebax/PEGDME selective layer.

### Results:

The FT-IR spectrum of the Pebax/PEGDME selective layer is presented in Fig. 1. The characteristic peaks at 1733  $\text{cm}^{-1}$  represent the stretching vibration of C=O. The N-H group is represented by the peak at 3300  $\text{cm}^{-1}$ . These two bonds are all contained in Pebax, and the shapes of the corresponding three peaks in the FT-IR spectrum of the Pebax/PEGDME layer are similar to those of pristine Pebax <sup>1</sup>. This result indicates the chemical stability of Pebax. The peaks at 2867 and 1102  $\text{cm}^{-1}$ , which correspond for C-H and C-O stretching, are very strong because of the existence of 50% PEGDME <sup>2</sup>. The selective layer shows no new absorbance peaks, which indicates the physical blending feature of Pebax and PEGDME.

### References:

1. H. Rabiee, M. Soltanieh, S. A. Mousavi and A. Ghadimi, *J Membrane Sci*, 2014, **469**, 43-58.
2. S. F. Wang, Y. Liu, S. X. Huang, H. Wu, Y. F. Li, Z. Z. Tian and Z. Y. Jiang, *J Membrane Sci*, 2014, **460**, 62-70.

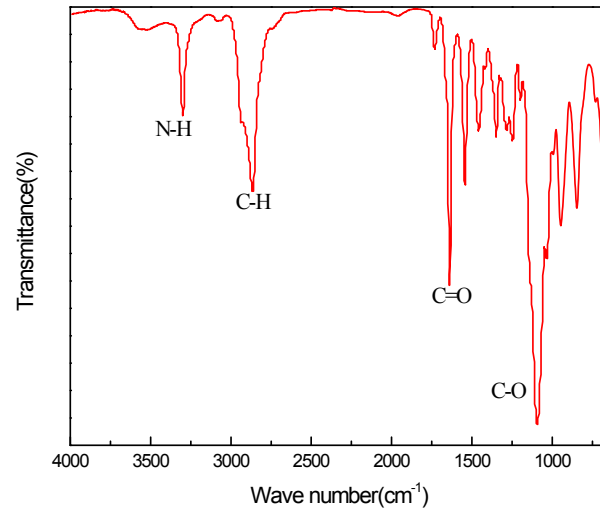

Fig. 1 FT-IR spectra of Pebax/PEGDME selective layer
